# Supplementary material for: Enhancement of Surfactin yield by improving the medium composition and fermentation process
Source: AMB Express. 2015 Aug 22;5:57. doi: 10.1186/s13568-015-0145-0 (PMC4546119; doi:10.1186/s13568-015-0145-0)
Supplement: Additional file 1. — Shake flask cultivations analyzing different glucose concentrations and yield enhancement of other Surfactin producer strains. [file 13568_2015_145_MOESM1_ESM.pdf]

**Supplementary data for manuscript**

*“Enhancement of Surfactin yield by improving the medium composition and fermentation process”*

*Submitted to AMB Express on 2015-05-13*

*Judit Willenbacher<sup>a,\*</sup>, Wladimir Yeremchuk<sup>a</sup>, Teresa Mohr<sup>a</sup>, Christoph Syldatk<sup>a</sup> and Rudolf Hausmann<sup>b</sup>*

<sup>a</sup>Institute of Process Engineering in Life Sciences, Section II: Technical Biology, Karlsruhe Institute of Technology (KIT), Engler-Bunte-Ring 1, 76131 Karlsruhe, Germany

<sup>b</sup>Institute of Food Science and Biotechnology (150), Section Bioprocess Engineering (150k), University of Hohenheim, Garbenstr. 25, 70599 Stuttgart, Germany

\*Corresponding author: Judit Willenbacher

Address: Engler-Bunte-Ring 1, 76131 Karlsruhe, Germany

Phone: +49-721-608-46737

Fax: +49-721-608-44881

Email: judit.willenbacher@kit.edu

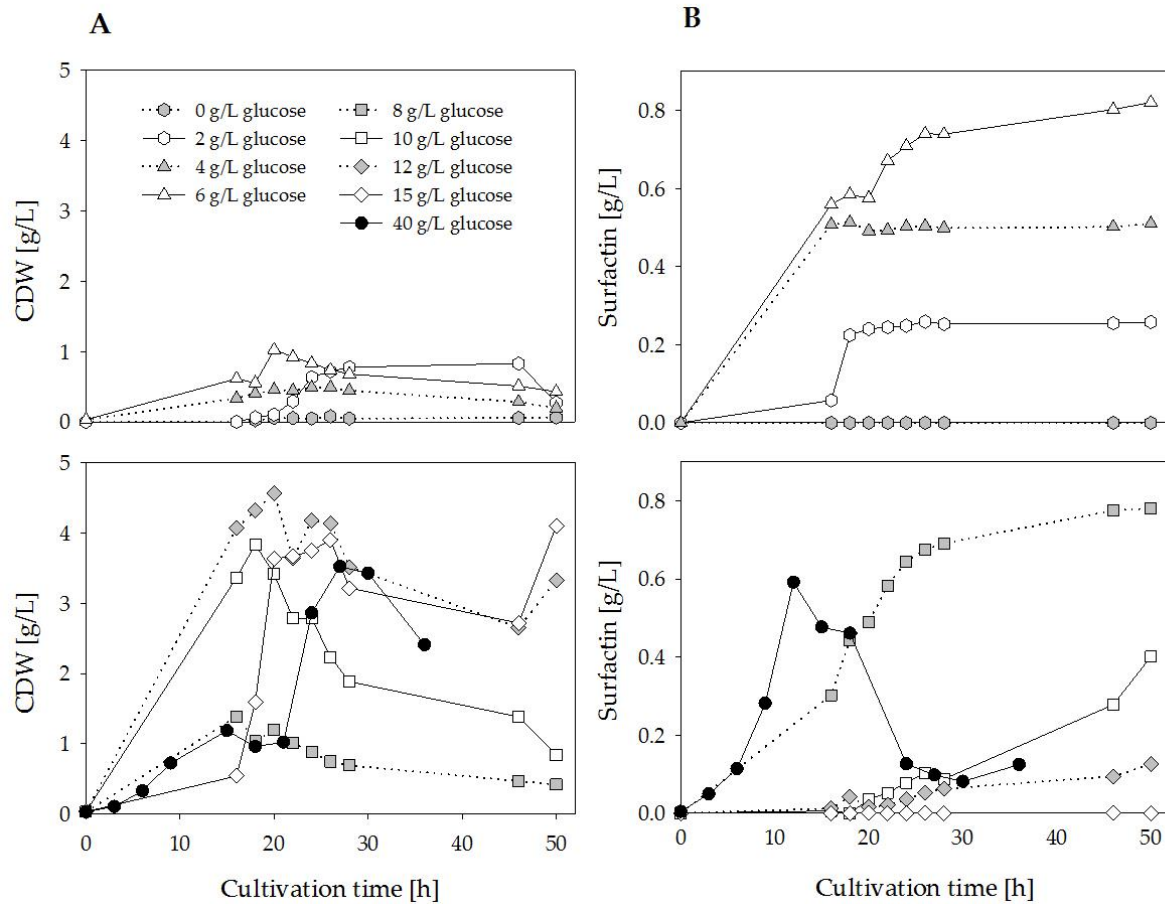

**Figure S1 Time course of CDW and Surfactin concentrations of shake flask cultivations of *B. subtilis* DSM 10<sup>T</sup> applying various glucose concentrations**

Cultivations in shake flasks were conducted employing 0 g/L (grey hexagon), 2 g/L (white hexagon), 4 g/L (grey triangle), 6 g/L (white triangle), 8 g/L (grey square), 10 g/L (white square), 12 g/L (grey rhombus) and 15 g/L (white rhombus) glucose. Data from earlier experiments employing the original 40 g/L are shown as black dots. The achieved CDW [g/L] is illustrated in **A**, the reached Surfactin concentration [g/L] is displayed in **B**. Shake flask experiments were conducted in duplicates and time-displaced flasks to illustrate a continuous course of CDW and Surfactin concentration

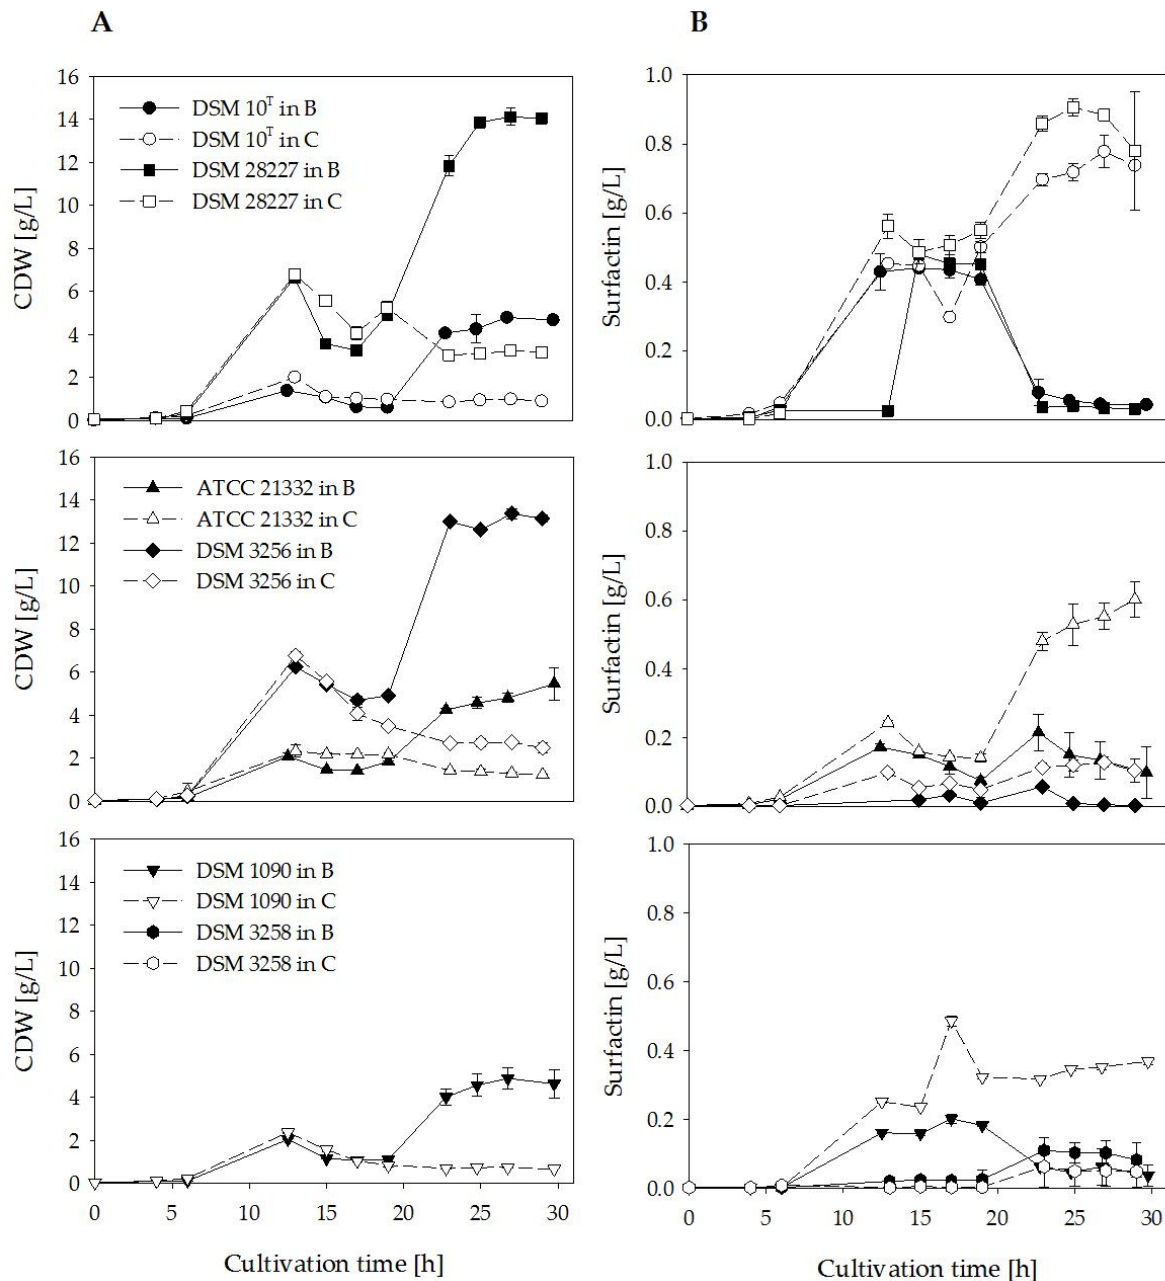

**Figure S2 Time course of CDW and Surfactin concentration of various *Bacillus* strains cultivated in medium B and further optimized medium C** In summary, six different Surfactin producers DSM 10<sup>T</sup> (dot), DSM 28227 (square), ATCC 21332 (regular triangle), DSM 3256 (rhombus), DSM 1090 (triangle upside down) and DSM 3258 (hexagon) were cultivated in medium B (illustrated in black) and further optimized medium C (displayed in white). The results of achieved CDW [g/L] are shown in A (the pelleted growth of DSM 3258 did not allow a determination of the

45 OD<sub>600</sub> absorption), whereas Surfactin concentrations [g/L] are illustrated in **B**. All  
46 experiments were conducted as duplicates and in time-displaced shake flasks to  
47 present continuous courses of CDW and Surfactin concentration

48
